# Supplementary material for: ‘Overgrowth’ mutants in barley and wheat: new alleles and phenotypes of the ‘Green Revolution’ Della gene
Source: PubMed Central journal article supplement — J Exp Bot. 2013 Feb 4;64(6):1603–13. doi: 10.1093/jxb/ert022 (PMC3617830; doi:10.1093/jxb/ert022), 2013-02-04
Supplement: supp_ert022_jexbot089607_file001.pdf [file supp_ert022_jexbot089607_file001.pdf]

**‘Overgrowth’ mutants in barley and wheat: new alleles and phenotypes of the  
‘Green Revolution’ DELLA gene**

*Peter Michael Chandler and Carol Anne Harding*

**Supplementary Data**

**Supplementary Table S1: Primers for sequencing 3' half of wheat *Rht-B1c***

|         |                     |
|---------|---------------------|
| Rht3F13 | GCGCTGGTGAAGCAGATAC |
| Rht3F20 | GTGGTCGACACGCAGGAG  |
| RhtR13  | CGGACGGTCGATCGTGG   |
| Rht3R40 | TTCAAACCTCGCGGTCACG |

**Supplementary Table S2: Coleoptile lengths (in mm) of barley overgrowth lines**

| <b>Line</b> | <b>Genotype</b>    | <b>Coleoptile length (mm)</b> |
|-------------|--------------------|-------------------------------|
| Himalaya    | <i>WT</i>          | 100.3 ± 1.6                   |
| M640        | <i>Sln1d</i>       | 32.6 ± 1.8                    |
| TR1         | <i>Sln1d.4</i>     | 65.8 ± 3.1                    |
| TR9         | <i>Sln1d.5</i>     | 40.7 ± 2.4                    |
| TR13        | <i>Sln1d.6</i>     | 45.2 ± 1.8                    |
| TR26        | <i>Sln1d,spyla</i> | 50.9 ± 1.0                    |
| TR56        | <i>Sln1d.7</i>     | 60.7 ± 2.1                    |
| TR60        | <i>Sln1d.8</i>     | 80.7 ± 2.5                    |
| TR100       | <i>Sln1d.9</i>     | 66.9 ± 1.7                    |
| TR103       | -                  | 58.5 ± 1.5                    |
| TR107       | <i>Sln1d.10</i>    | 44.6 ± 2.0                    |
| M463        | <i>grd2b</i>       | 62.4 ± 2.2                    |
| TR216       | <i>grd2b,sln1s</i> | 84.1 ± 1.7                    |
| TR261       | <i>grd2b,sln1m</i> | 96.4 ± 3.5                    |
| TR305       | <i>grd2b,sln1o</i> | 104.4 ± 2.0                   |
| M693        | <i>gse1n</i>       | 72.0 ± 1.5                    |
| TR407       | <i>gse1n,sln1n</i> | 89.7 ± 1.5                    |
| M240        | <i>sln1m</i>       | 123.3 ± 2.7                   |
| M242        | <i>sln1n</i>       | 119.8 ± 2.3                   |
| M243        | <i>sln1s</i>       | 112.9 ± 4.6                   |
| M247        | <i>spyla</i>       | 101.6 ± 2.5                   |

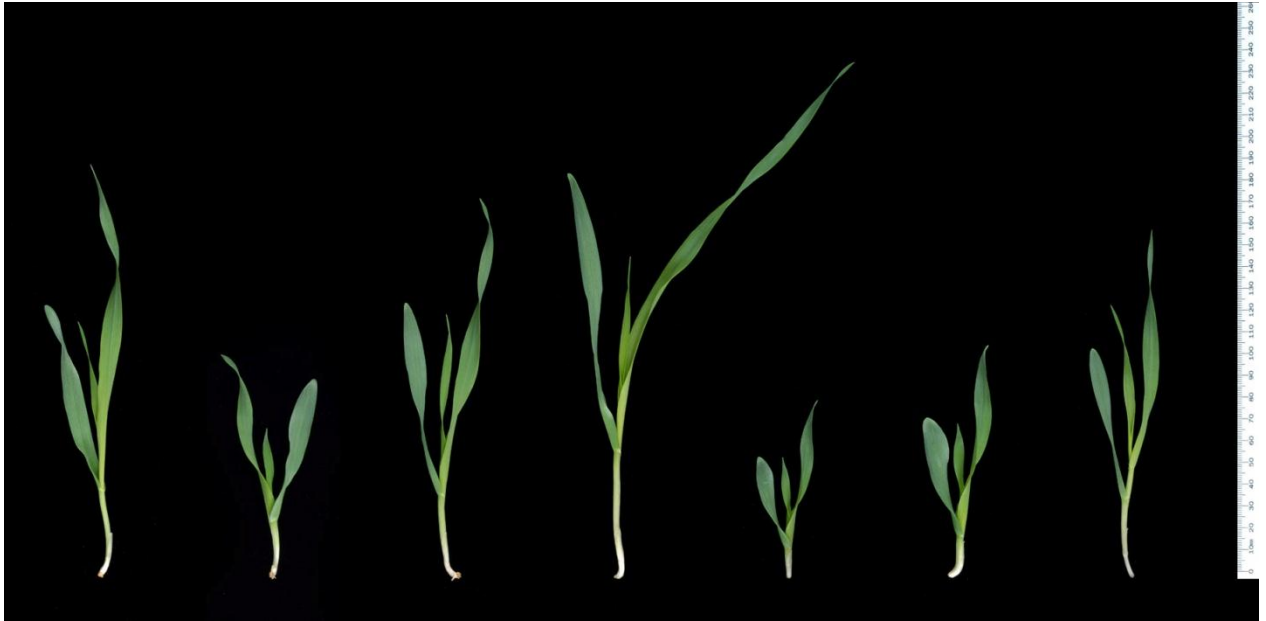

**Supplementary Fig. S1. Seedlings of different genotypes at the same age.** Left to right: Himalaya (*WT*), M463 (*grd2b*), TR261 (*grd2b, sln1m*), M240 (*sln1m*), M640 (*Sln1d*), TR107 (*Sln1d.10*), TR60 (*Sln1d.8*).
